# Supplementary material
Source: PubMed Central journal article supplement (PMC5096797)
Supplement: jci-126-87041-s001.pdf [file jci-126-87041-s001.pdf]

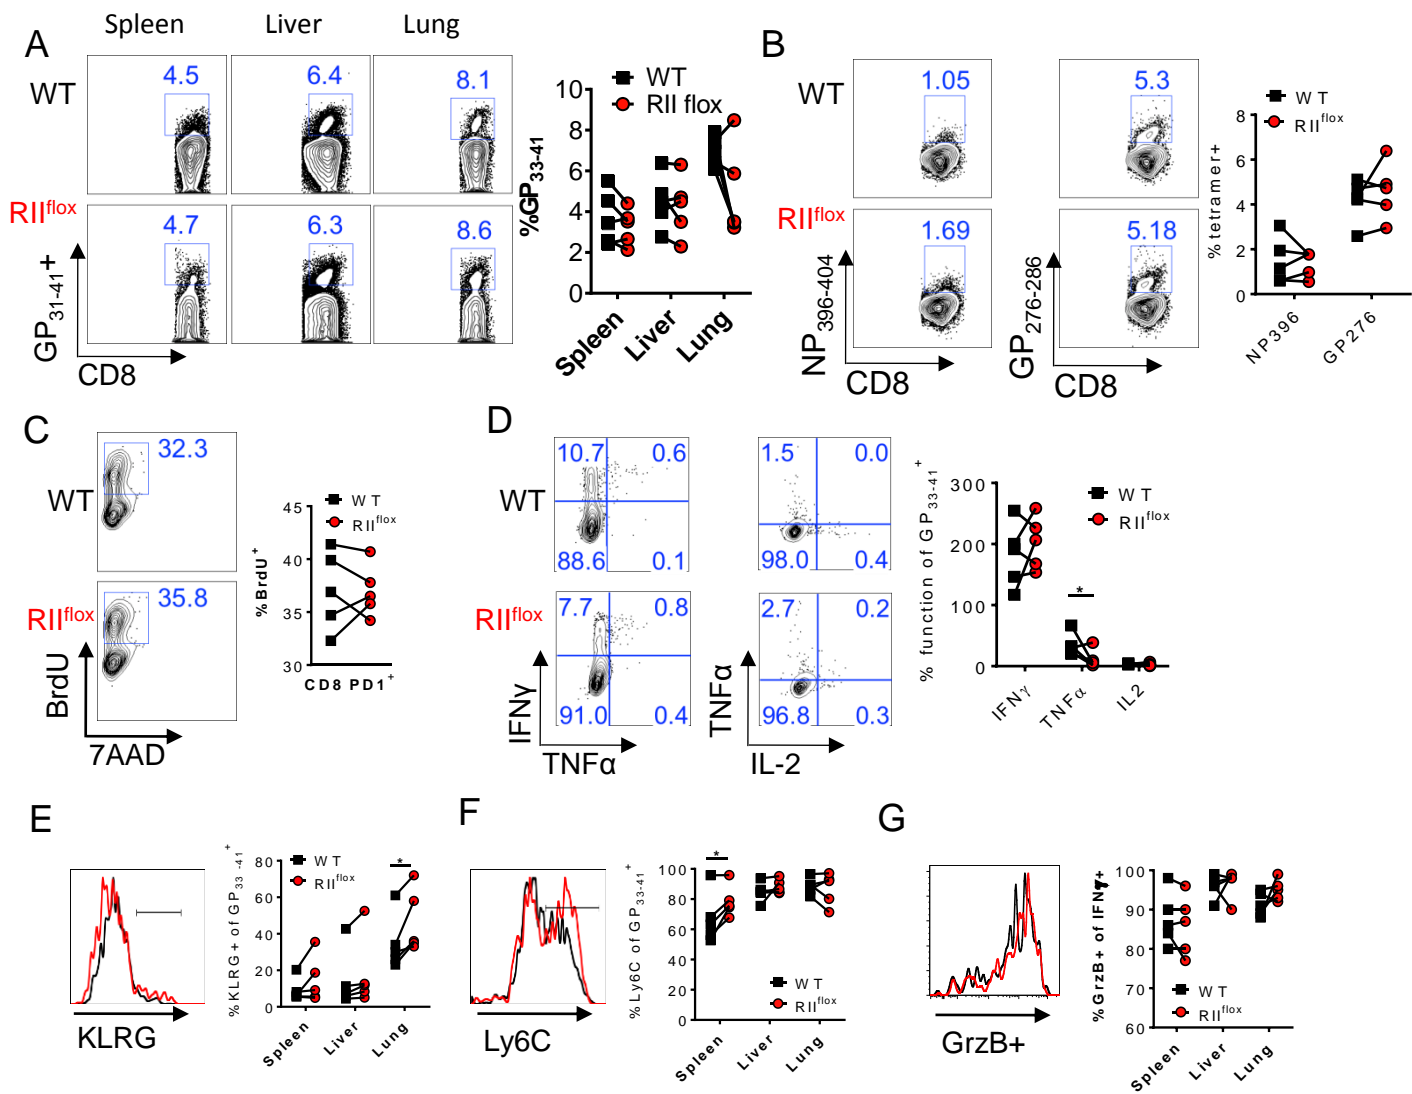

**Figure S1. Cell-intrinsic TGF $\beta$ RII signaling minimally impacts antiviral CD8 T cell responses early after chronic LCMV infection.** Reconstituted 1:1 mix of WT(CD45.1, black) and ERcre<sup>+</sup>TGF $\beta$ RII<sup>flox/flox</sup> (RII<sup>flox</sup>-CD45.2, red) bone marrow chimeric mice were tamoxifen treated, rested, and infected with  $2 \times 10^6$  PFU of LCMV Cl13. Spleens and tissues were analyzed 9 days p.i. for the presence of LCMV specific CD8 T cells by flow cytometry. **A)** Percentage of D<sup>b</sup>:GP<sub>33-41</sub> CD8 T cells after gating on CD8 T cells from donor compartments in indicated tissue. **B)** Percentage of D<sup>b</sup>:NP<sub>396-404</sub> and D<sup>b</sup>:GP<sub>276-286</sub> specific LCMV CD8 T cells in the spleen. **C)** Incorporation of BrdU after 16 hour pulse in splenic CD8 PD1<sup>+</sup> T cells from either WT or ERcre<sup>+</sup> TGF $\beta$ RII<sup>flox/</sup> compartment. **D)** Production of intracellular IFN $\gamma$ , TNF $\alpha$ , IL-2 after 5 hr stimulation with GP<sub>33-41</sub> cognate peptide, graphed as percentage of D<sup>b</sup>:GP<sub>33-41</sub> cells from (A). **E-G)** Percentages of virus specific D<sup>b</sup>:GP<sub>33-41</sub><sup>+</sup> cells expressing KLRG, Ly6C and GranzymeB. Representative of 3 independent experiments of n=4-5 mice/exp. Paired t-test: \*p<0.05, \*\*p<0.005.

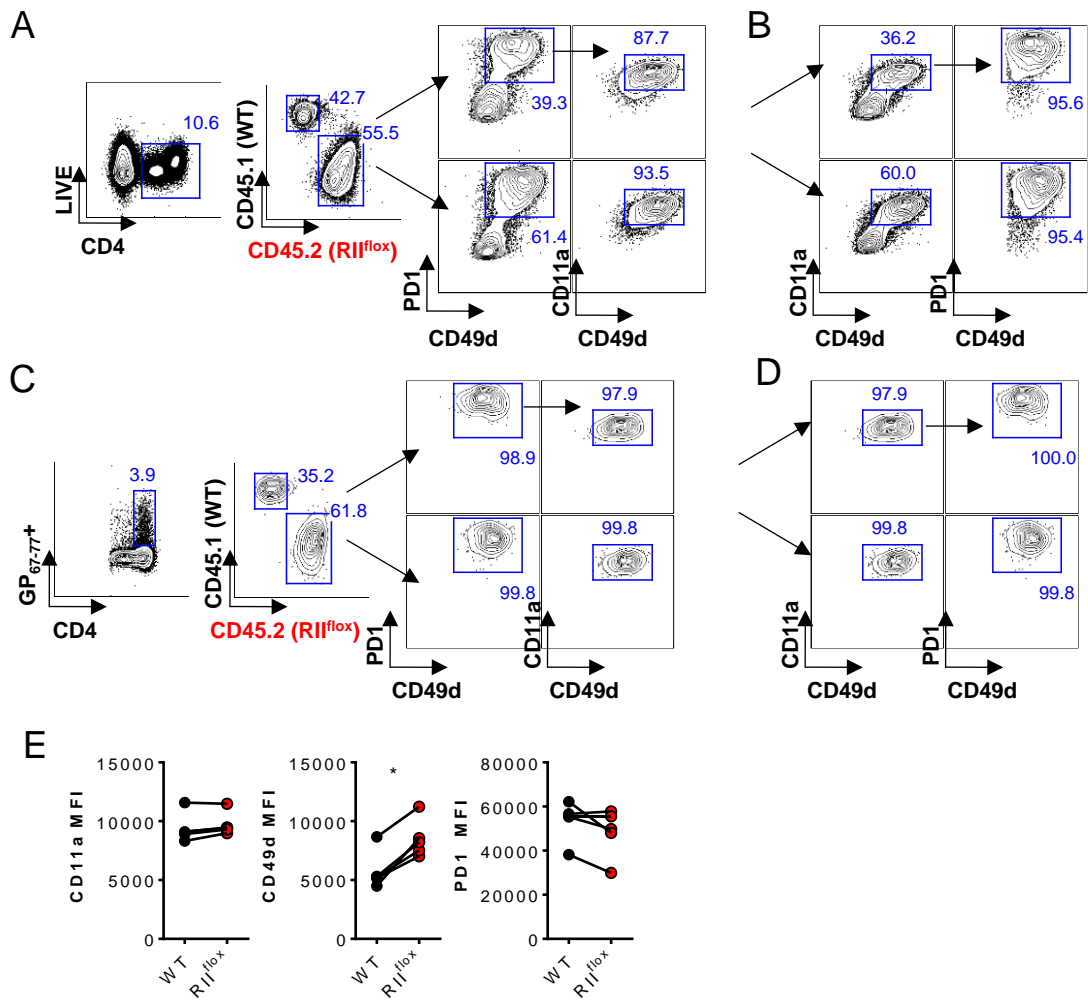

**Figure S2. CD11a<sup>+</sup> CD49d<sup>+</sup> cells and PD1<sup>+</sup> cells are overlapping populations in total and virus-specific CD4 T cells during chronic LCMV infection.** 8 weeks post-bone marrow reconstitution with 1:1 mix of WT (CD45.1, black) and ERcre<sup>+</sup> TGFβRII<sup>flox/flox</sup> (RII<sup>flox</sup>-CD45.2, red) bone marrow, mice were tamoxifen treated and infected with 2x10<sup>6</sup> PFU of LCMV Cl13. Spleens were analyzed 9 days p.i. by flow cytometry. **A-B**) Percentage of CD4 T cells from each compartment that co-express PD1, CD11a and CD49d first gating on PD1<sup>+</sup> cells (a) or first gating on CD11a<sup>+</sup> CD49d<sup>+</sup> cells (b). **C-D**) Percentage of I-A<sup>b</sup>-GP<sub>67-77</sub> tetramer<sup>+</sup> CD4 T cells from each compartment that co-express PD1, CD11a and CD49d first gated on PD1<sup>+</sup> cells (c) or first gating on CD11a and CD49d (d). **E**) MFI of indicated marker on I-A<sup>b</sup>-GP<sub>67-77</sub> tetramer<sup>+</sup> CD4 T cells from (c). Representative of 2 independent experiments of n=4-5 mice/group. Paired t-test \*p<0.05, \*\*p<0.005, \*\*\*p<0.0005.

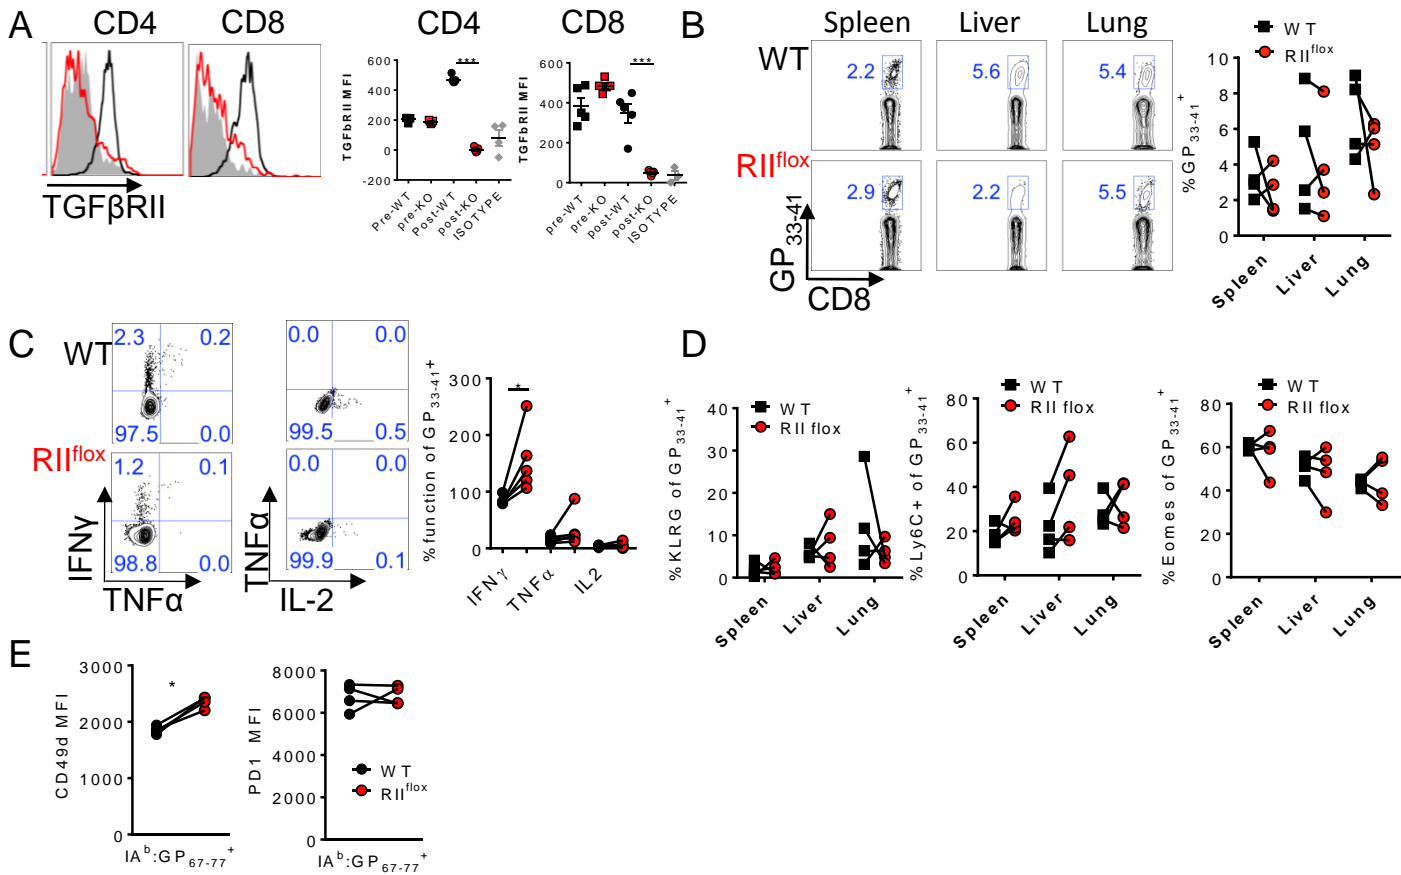

**Figure S3. Cell-intrinsic TGFβRII signaling in adults does not limit LCMV-specific CD8 T cell responses late after chronic infection. A-D)** Reconstituted 1:1 mix of WT(CD45.1, black) and ERcre<sup>+</sup>TGFβRII<sup>fllox/fllox</sup> (RII<sup>fllox</sup>-CD45.2, red) bone marrow chimeras mice first infected with 2x10<sup>6</sup> PFU of LCMV CI13 then tamoxifen treated days 12-17p.i. and spleens analyzed at day 30 p.i. for the presence of LCMV specific T cells. **A)** TGFβRII expression in T cells post-tamoxifen over isotype (gray). **B)** Percentage D<sup>b</sup>:GP<sub>31-41</sub><sup>+</sup> of CD8 T cells in indicated tissues. **C)** Co-production of intracellular IFNγ and TNFα or TNFα and IL-2 after 5 hr stimulation with GP<sub>33-41</sub> peptide, graphed as percent of D<sup>b</sup>:GP<sub>33-41</sub><sup>+</sup> cell from (B). **D)** Expression of KLRG Ly6C and EOMES gated on D<sup>b</sup>:GP<sub>33-41</sub><sup>+</sup> cells from (B). **E)** CD49d and PD1 MFI on CD4<sup>+</sup> IA<sup>b</sup>:GP<sub>67-77</sub><sup>+</sup> cells from the spleen. Representative of 3 independent experiments of n=4-5 mice/group. Paired t-test, \*p<0.05, \*\*p<0.005, \*\*\*p<0.0005.

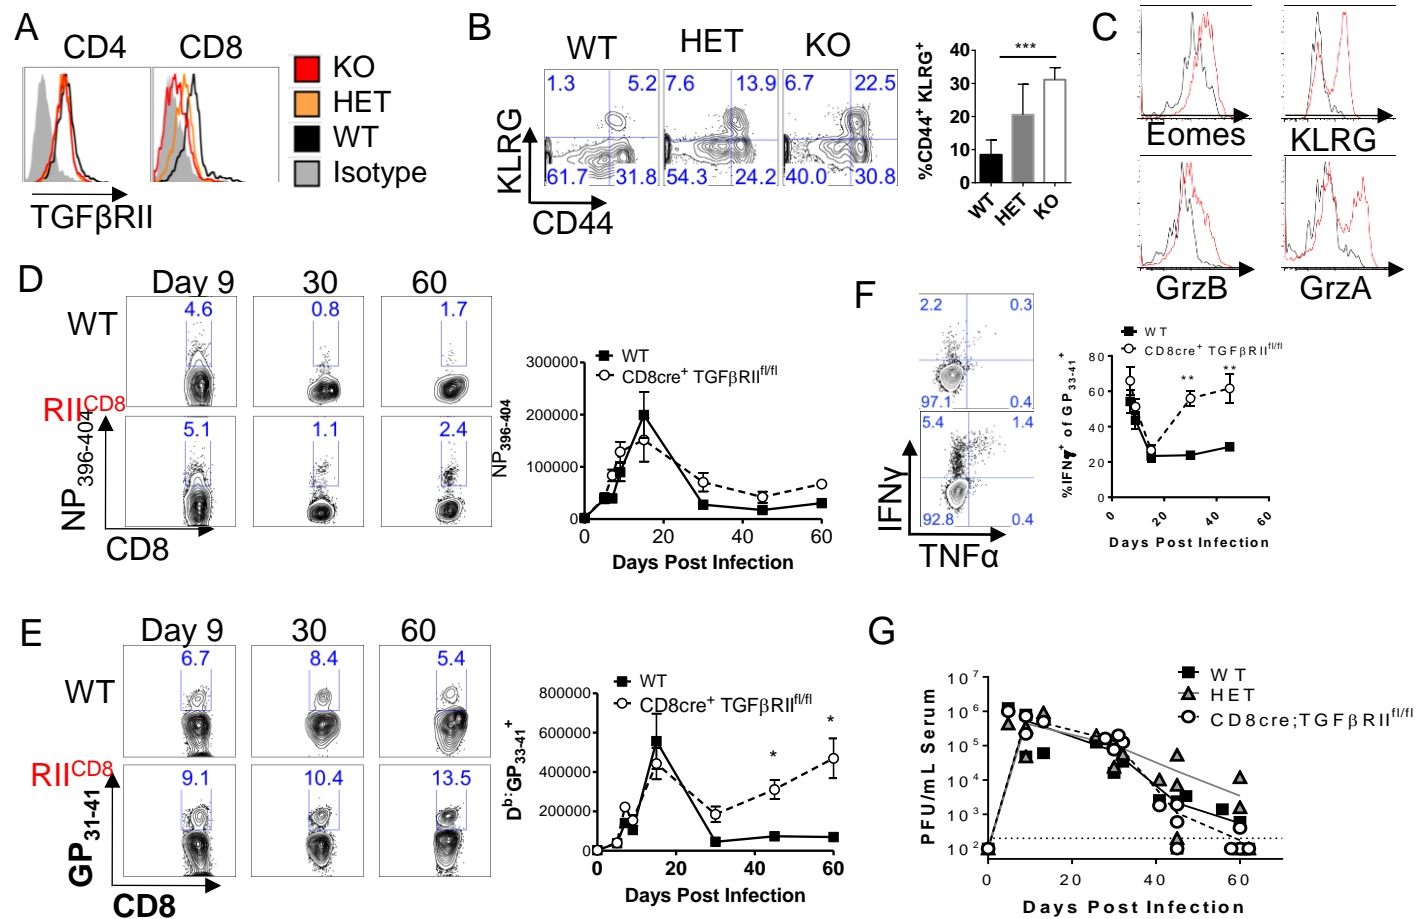

**Figure S4. TGFβRII signaling in CD8 T cells from birth does not limit LCMV-specific CD8 T cell responses after chronic infection.** CD8<sup>cre+</sup> TGFβRII<sup>fl/fl</sup> (RII<sup>CD8</sup>) mice and Cre- littermate controls infected with 2x10<sup>6</sup> PFU of LCMV CI13 and blood monitored. **A**) TGFβRII expression on CD4 T cell and CD8 T cells prior to infection. **B**) Percentage of CD44<sup>+</sup> CD8 T cells expressing KLRG prior to infection. **C**) Expression of Eomes, KLRG GrzB and GrzA prior to infection gated on CD44<sup>hi</sup> cells. **D**) Number of virus specific D<sup>b</sup>:NP<sub>396-404</sub><sup>+</sup> cells over time post infection. **E**) Number of virus specific D<sup>b</sup>:GP<sub>33-41</sub><sup>+</sup> cells. **F**) IFNγ and TNFα production upon cognate peptide ex-vivo graphed as a percentage of tetramer<sup>+</sup> cells from (i). **G**) Viremia over time by plaque assay as PFU/mL serum. Representative of 3 independent experiments of n=4-5 mice/group. Two-way ANOVA, \*p<0.05, \*\*p<0.005, \*\*\*p<0.0005.

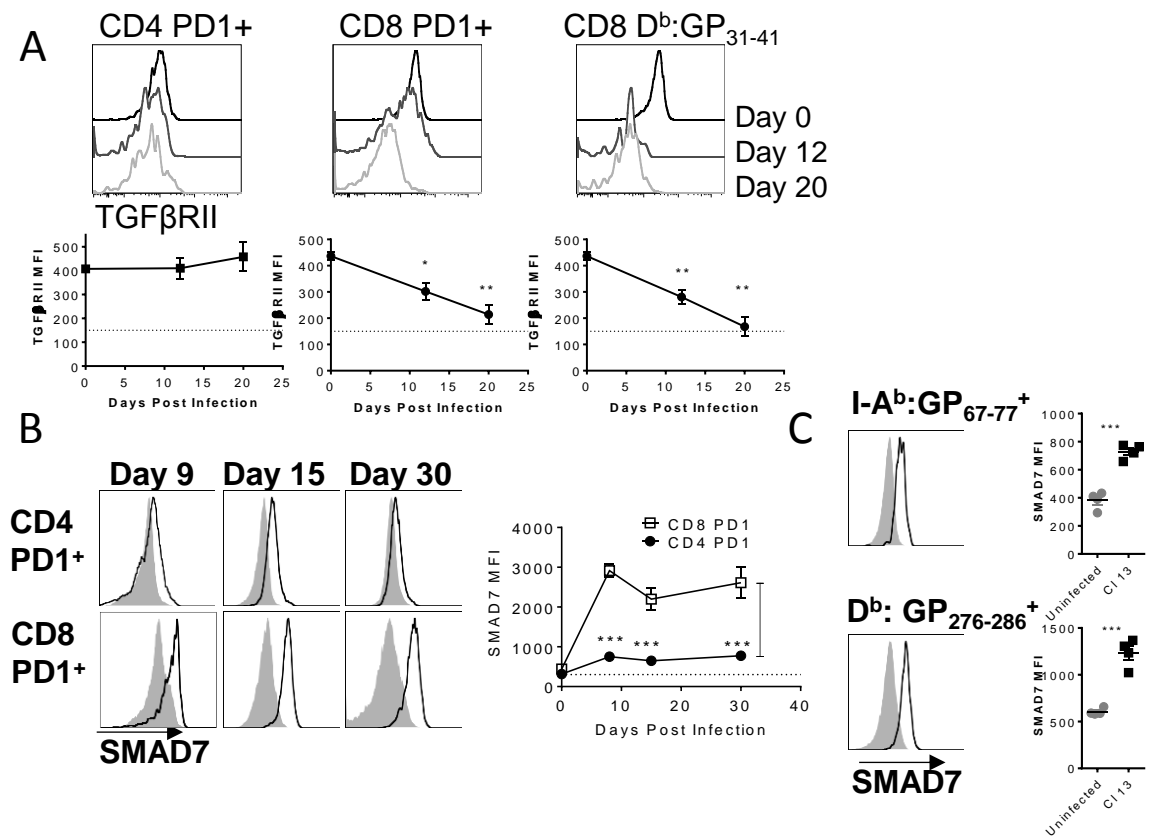

**Figure S5. Differential TGFβR and SMAD7 expression in CD4 and CD8 T cells during chronic LCMV infection.** C57BL/6 mice were infected with  $2 \times 10^6$  PFU LCMV C113 i.v. or left uninfected. **A)** Surface TGFβRII expression gated on CD4<sup>+</sup> PD1<sup>+</sup>, CD8<sup>+</sup> PD1<sup>+</sup>, or CD8<sup>+</sup> D<sup>b</sup>:GP<sub>33-41</sub> tetramer<sup>+</sup> T cells in the blood was determined in uninfected mice (day 0) or at indicated times after LCMV C113 infection. **B)** Splenic CD4 PD1<sup>+</sup> or CD8 PD1<sup>+</sup> T cells from LCMV-C113 infected mice (black histograms) were stained for intracellular SMAD7 at indicated days post infection and compared to uninfected mice (grey histograms). SMAD7 MFI in the indicated T cell populations is depicted throughout LCMV C113 infection (right graph). **C)** LCMV specific CD4<sup>+</sup> I-A<sup>b</sup>:GP<sub>67-77</sub> tetramer<sup>+</sup> or CD8<sup>+</sup> D<sup>b</sup>:GP<sub>276-286</sub> tetramer<sup>+</sup> T cells were stained for SMAD7 at day 8 p.i.. Representative of 2 independent experiments with 3-5 mice/group. Two-way ANOVA, \*p<0.05, \*\*p<0.005, \*\*\*p<0.0005.

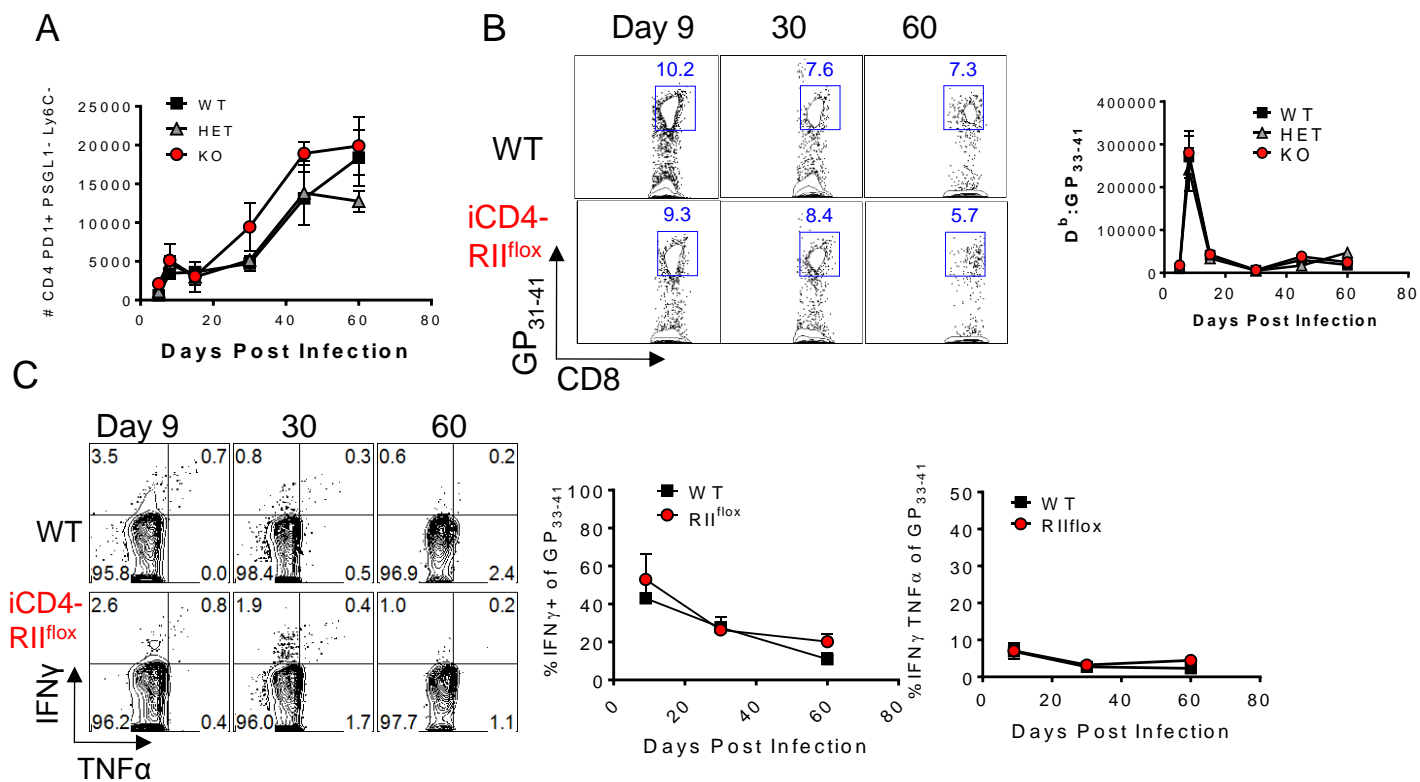

**Figure S6. CD4 restricted TGF $\beta$ RII signaling does not influence circulating PSLG1-Ly6C<sup>-</sup> CD4 T cells or CD8 T cell responses after chronic viral infection.** CD4-ERcre<sup>+</sup> TGF $\beta$ RII<sup>flox/flox</sup> (RII<sup>flox</sup>) mice and Cre- littermate controls were infected with  $2 \times 10^6$  PFU of LCMV Cl13. Blood was monitored for the presence of LCMV specific T cells by flow cytometry. **A)** Number of CD4<sup>+</sup> PD1 T cells that are PSLG1-Ly6C<sup>-</sup> Tfh like cells. **B)** Number of virus specific D<sup>b</sup>:GP<sub>33-41</sub><sup>+</sup> cells over time post infection. **C)** IFN $\gamma$  and TNF $\alpha$  production upon cognate peptide stimulation ex-vivo graphed as a percentage of tetramer+ cells from (b). Representative of 3 independent experiments of n=4-5 mice/group. Two-way ANOVA, \*p<0.05, \*\*p<0.005, \*\*\*p<0.0005.

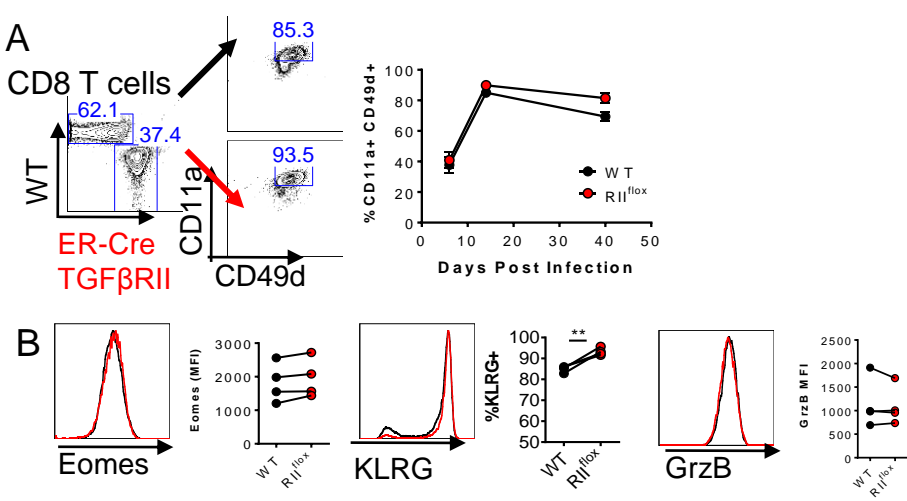

**Figure S7. TGFβ suppression of Eomes-driven CD4 T cell responses is common to chronic MCMV infection in-vivo.** Mixed chimeras with 1:1 ratio of WT (CD45.1, black) and ERcre<sup>+</sup> TGFβRII<sup>flox</sup> (CD45.2, red) BM reconstituted prior to TGFβRII deletion, were infected with 2x10<sup>4</sup> pfu MCMV i.p.. **A)** Proportion of CD8 T cells expressing activation markers CD11a and CD49d over time after gating on congenic marker, 14 d.p.i. is shown. **B)** Overlays of Eomes, KLRG, and GranzymeB expression in activated CD8 T cells. Representative of 2 independent experiments of n=4-5 mice/group. Two-way ANOVA (a) or paired t-test (b), \*p<0.05, \*\*p<0.005.

**Supplemental Table 1. Clinical summary of patient samples used.**

| <u>Donor ID</u> | <u>Sex</u> | <u>Age</u> | <u>Status</u> | <u>HAART</u> | <u>CD4</u> | <u>HIV RNA</u> |
|-----------------|------------|------------|---------------|--------------|------------|----------------|
| <b>1002</b>     | M          | 44         | Chronic       | No           | 650        | 12.143         |
| <b>1007</b>     | M          | 50         | Chronic       | No           | 355        | 11.800         |
| <b>1010</b>     | M          | 39         | Chronic       | No           | 383        | 26.541         |
| <b>1011</b>     | M          | 48         | Chronic       | No           | 434        | 40.300         |
| <b>1012</b>     | M          | 41         | Chronic       | No           | 598        | 75.500         |
| <b>1014</b>     | M          | 29         | Chronic       | No           | 402        | 20.317         |
| <b>1016</b>     | M          | 48         | Chronic       | No           | 668        | 18.144         |
| <b>1017</b>     | M          | 29         | Chronic       | No           | 383        | 99.206         |
| <b>1019</b>     | M          | 48         | Chronic       | No           | 753        | 33.316         |
| <b>1020</b>     | M          | 43         | Chronic       | No           | 728        | 9.536          |
